# Supplementary material for: Upregulation of the EGFR/MEK1/MAPK1/2 signaling axis as a mechanism of resistance to antiestrogen-induced BimEL dependent apoptosis in ER+ breast cancer cells
Source: PubMed Central journal article supplement — Int J Oncol. 2022 Dec 16;62(2):20. doi: 10.3892/ijo.2022.5468 (PMC9854236; doi:10.3892/ijo.2022.5468), 2022-12-16

Figure S1. Autophagic protein catabolism is active in breast cancer cells undergoing antiestrogen treatment as a single agent or in combination with antiprogesterin treatment. Evenly seeded MCF-7 cells were treated with E2 (10 nM) alone or in combination with 1.0  $\mu$ M 4-OHT, 10  $\mu$ M MIF, or 4-OHT + MIF (1.0  $\mu$ M + 10.0  $\mu$ M, respectively). At the times indicated and as described in Materials and methods the following were determined: (A) an increase in the number of cytosolic autophagosomes and autolysosomes identified by electron microscopy in cells treated with 4-OHT and/or MIF compared to E2 treated cells; (B) an increase in long-lived protein catabolism in cells treated with 4-OHT, MIF, and 4-OHT plus MIF as compared to E2-treated control cells (long-lived protein catabolism is an independent measure of autophagy); (C) total cell counts utilizing a Coulter Counter to confirm the efficacy of E2 in promoting MCF-7 cell growth, and 4-OHT treatment as a single agent or in combination with MIF in blocking cell growth; and (D) an increase in cytosolic autophagosomes/autolysosomes (designated by arrows) induced by 4-OHT plus MIF treatment versus E2 treatment as determined by electron microscopic examination; mitochondria are designated by arrow heads. Comparisons which are statistically significant ( $P < 0.05$  or  $P < 0.001$ ) are designated by an \* or \*\*, respectively and are between: <sup>a</sup>the designated treatment compared to the E2 control cells; and <sup>b</sup>the designated treatment compared to the 4-OHT treatment.

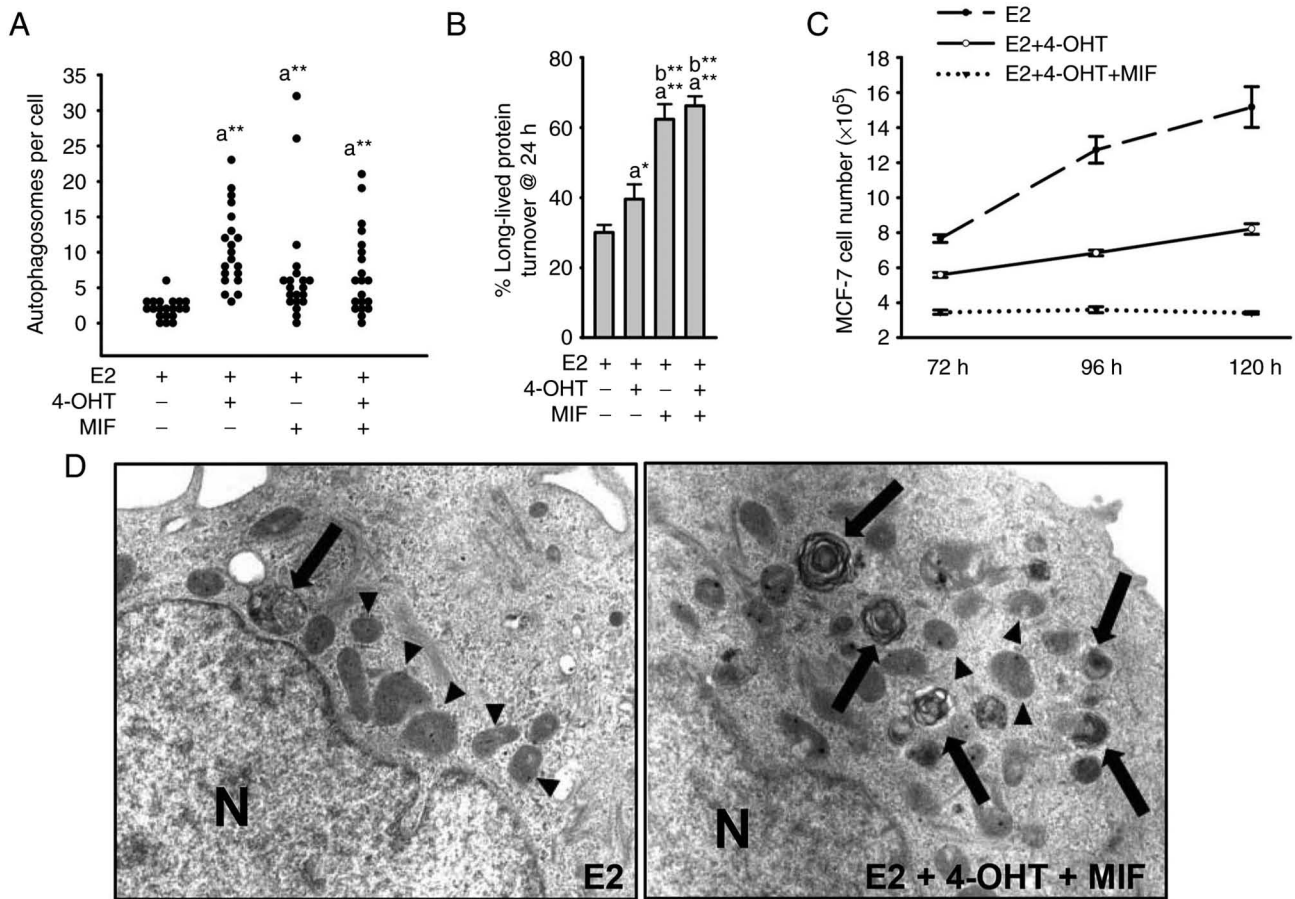

Supplement: Supplementary_Data.pdf [file Supplementary_Data.pdf]
